# Supplementary material for: Low Adherence to Mediterranean Diet Is Associated with Probable Sarcopenia in Community-Dwelling Older Adults: Results from the Longevity Check-Up (Lookup) 7+ Project
Source: MDPI journal article supplement (doi:10.3390/nu15041026), 2023-02-18
Supplement: s1 [file s1]

**Supplementary Table S1** Medi-Lite Scoring System Used in the Study (Modified from [33]).

| Food categories        | Scores            |                     |                    |
|------------------------|-------------------|---------------------|--------------------|
|                        | 0                 | 1                   | 2                  |
| Fruit                  | <1 portion/day    | 1–1.5 portions/day  | >1.5 portions/day  |
| Vegetables             | <1 portion/day    | 1–2.5 portions/day  | >2.5 portions/day  |
| Legumes                | <1 portion/day    | 1–2 portions/day    | >2 portions/day    |
| Cereals                | <1 portion/day    | 1–1.5 portions/day  | >1.5 portions/day  |
| Fish and fish products | <1 portion/week   | 1–2.5 portions/week | >2.5 portions/week |
| Meat and meat product  | >1.5 portions/day | 1–1.5 portions/day  | <1 portion/day     |
| Dairy products         | >1.5 portions/day | 1–1.5 portions/day  | <1 portion/day     |
| Olive oil              | Occasional use    | Frequent use        | Regular use        |
